# Supplementary material for: Chimeric protein identification of dystrophic, Pierson and other laminin polymerization residues
Source: PubMed Central journal article supplement — Matrix Biol. Author manuscript; Available in PMC 2018 Apr 21. (PMC5910262; doi:10.1016/j.matbio.2018.01.012), 2018-03-03
Supplement: NIHMS949592-supplement-supplement.pdf [file NIHMS949592-supplement-supplement.pdf]

**Supplemental Table 1. DNA constructs for xLNND proteins**

| <i>clone</i>        | <i>enzymes</i> | <i>5' 3' 1st pcr, 2nd pcr sizes</i> | <i>cut sites</i> | <i>vector size</i> | <i>1<sup>st</sup> forward primer</i> | <i>2<sup>nd</sup> reverse primer</i> | <i>2<sup>nd</sup> forward primer</i> | <i>1<sup>st</sup> reverse primer</i> |
|---------------------|----------------|-------------------------------------|------------------|--------------------|--------------------------------------|--------------------------------------|--------------------------------------|--------------------------------------|
| <b>αLNND clones</b> |                |                                     |                  |                    |                                      |                                      |                                      |                                      |
| Q157P               | HindIII-XagI   | 680bp, 1157bp, 1816bp               | 1510bp           | 7648bp             | GTAGCGGTGACGGT<br>GGGAG              | GACGGCATAGTACGG<br>CCAGGG            | CC2TGGCCGTACTATGC<br>CGTC            | CATGCAGAGTGCAGA<br>GACTATGC          |
| C73R                | HindIII-Eco91I | 430bp, 1780bp, 2180bp               | 2064bp           | 7094bp             | GTAGCGGTGACGGT<br>GGGAG              | CGTACACAGACCCGGCG<br>TTGGCGGTGTCGA   | TCGACACGCCCAACGC<br>CGGGTCTGTGACG    | TGGGTGCCCCAGGAA<br>GGTCACCTCAGC      |
| K171E               | HindIII-XagI   | 710bp, 1109bp, 1816bp               | 1510bp           | 7648bp             | GTAGCGGTGACGGT<br>GGGAG              | GTGGAGTTATTTTCGTA<br>GCGGGTTC        | GACCCGCTACGAAATA<br>ACTCCAC          | CATGCAGAGTGCAGA<br>GACTATGC          |
| <b>βLNND clones</b> |                |                                     |                  |                    |                                      |                                      |                                      |                                      |
| WT                  | HindIII-BsrGI  | 1774bp, 965bp, 2738bp               | 2143bp           | 6897bp             | GGCGTGGATAGCGGT<br>TTGAC             | CACAAGTCTGCTGTCTCG<br>ACATCCATC      | GATGGATGTCGACAGC<br>AGACTTGTG        | CGAGGAGACGGGCA<br>GACTTTC            |
| S68R                | HindIII-EcoNI  | cut from 111580R                    | 826bp            | 8263bp             |                                      |                                      |                                      |                                      |
| S68A                | HindIII-EcoNI  | 512bp, 803bp, 1296bp                | 826bp            | 8263bp             | GGCGTGGATAGCGGT<br>TTGAC             | CTGCAAGTGGCGGAC<br>GATACAG           | CTGTATCGTGCCTTACT<br>TGCAG           | CCGAAACAGCAACCGC<br>CTGTA            |
| R234Q               | HindIII-EcoNI  | cut from 111R246Q                   | 826bp            | 8263bp             |                                      |                                      |                                      |                                      |
| H135R               | HindIII-EcoNI  | 713bp, 604bp, 1296bp                | 826bp            | 8263bp             | GGCGTGGATAGCGGT<br>TTGAC             | GTCATTACGAGATGAG<br>TAAATGG          | CCATTTACTCATCTCGT<br>AATGAC          | CCGAAACAGCAACCGC<br>CTGTA            |
| E198K               | HindIII-EcoNI  | 893bp, 420bp, 1296bp                | 826bp            | 8263bp             | GGCGTGGATAGCGGT<br>TTGAC             | GTTGAGGGTTCAATCT<br>TAGAATATC        | GATATTTAAGATTGAA<br>CCCTCAAC         | CCGAAACAGCAACCGC<br>CTGTA            |
| K184E               | HindIII-EcoNI  | 859bp, 458bp, 1296bp                | 826bp            | 8263bp             | GGCGTGGATAGCGGT<br>TTGAC             | GTCAATCGACTTCTTTCA<br>TGGGGCC        | GGCCCATGAAAAGAAG<br>TCGATGAC         | CCGAAACAGCAACCGC<br>CTGTA            |
| <b>γLNND clones</b> |                |                                     |                  |                    |                                      |                                      |                                      |                                      |
| WT                  | NheI-BsrGI     | 2642bp                              | 2188bp           | 2188bp             | GGCGTGGATAGCGGT<br>TTGACT            | GGCACAAAGTCTGCTGT<br>GGCCTGCATCCTGC  | GCAAGGATGCAGGCCAC<br>AGCAGACTTGTGCC  | CGAGGAGACGGGCA<br>GACTTTC            |
| Y145R               | NheI-BsrGI     | 795bp, 1866bp, 2642bp               | 2188bp           | 2188bp             | GGCGTGGATAGCGGT<br>TTGACT            | GGAACCTTGAGACGCA<br>CACGGGTGATG      | CATCACCCGTGTGCGTC<br>TCAAAGTTCC      | CGAGGAGACGGGCA<br>GACTTTC            |
| R147E               | NheI-BsrGI     | 801bp, 1860bp, 2642bp               | 2188bp           | 2188bp             | GGCGTGGATAGCGGT<br>TTGACT            | GAACTTGAGCTCCACA<br>TAGGTGATGTC      | GACATCACCTATGTGG<br>AGCTCAAAGTTTC    | CGAGGAGACGGGCA<br>GACTTTC            |
| <b>Laminin</b>      |                |                                     |                  |                    |                                      |                                      |                                      |                                      |
| hLm111β             | HindIII-       | 1012bp, 1875bp,                     | 1957bp           | 8446bp             | GGCGTGGATAGCGGT                      | CACAAACTTGATTTTC                     | CAAACCTTGCAAAATCAAG                  | GCAGTGTGATCGGTG                      |
| 1R234Q              | ClaI           | 2865bp                              |                  |                    | TTGAC                                | AAGTTGG                              | TTTGTG                               | CTTAC                                |

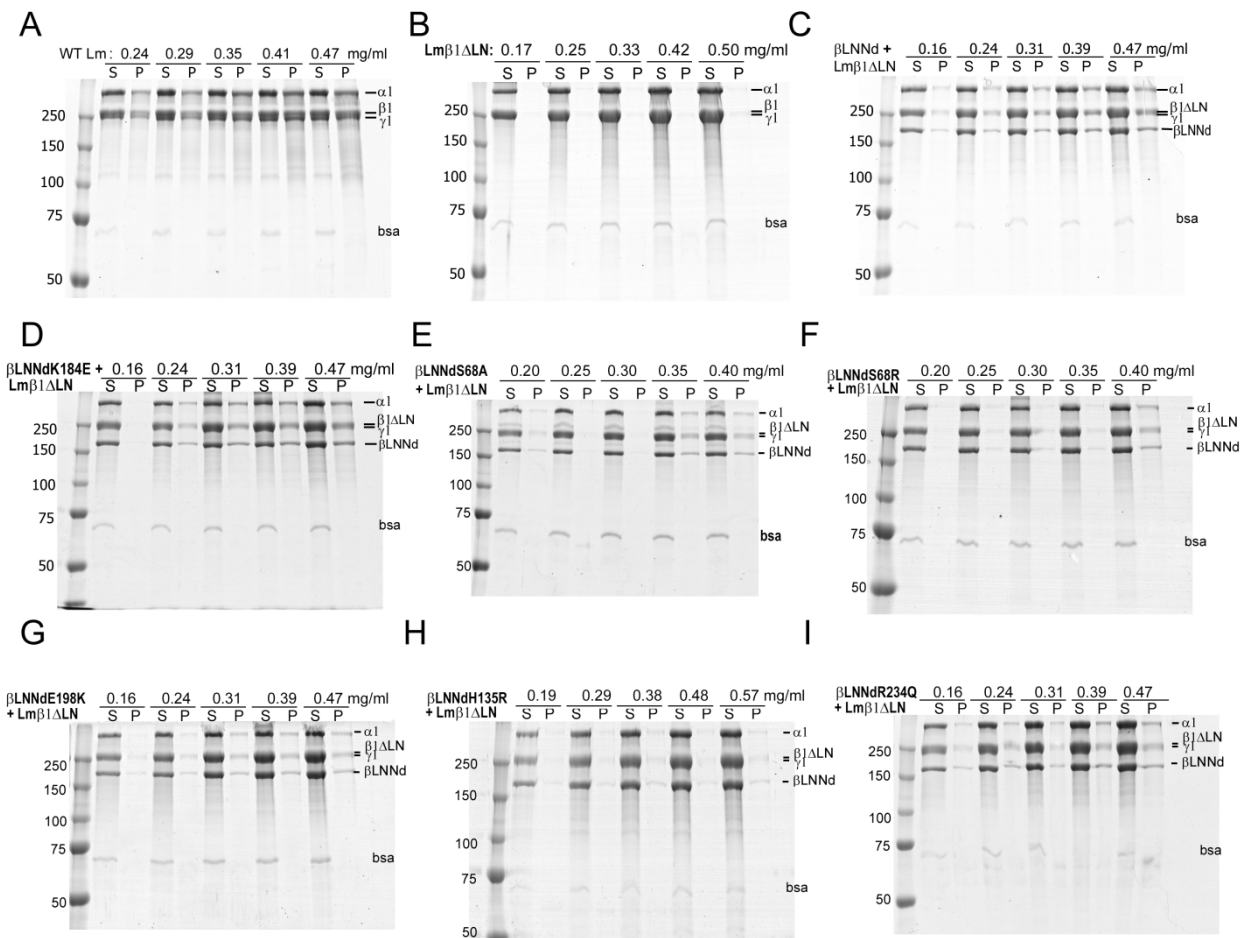

**Supplemental Fig. 1. Polymerization of  $\beta$ LNNd--Lm $\beta$ 1 $\Delta$ LN complexes.** WT Lm111, Lm $\beta$ 1 $\Delta$ LN, and WT and modified  $\beta$ LNNd proteins bound to and co-purified with Lm $\beta$ 1 $\Delta$ LN were incubated at 37°C for 3 h in 50  $\mu$ l aliquots at different concentrations that were then centrifuged to sediment the polymer (P) fraction and separate it from the non-polymerized supernatant (S) fraction. These were then analyzed under reducing conditions by SDS-PAGE and stained with Coomassie blue. WT Lm111,  $\beta$ LNNd complex, and  $\beta$ LNNdK184E (chosen as likely “control” with non-conserved residue) polymerized whereas complexes with  $\beta$ LNNd containing conserved residue mutations showed little or no polymerization. Plots shown in Fig. 3.

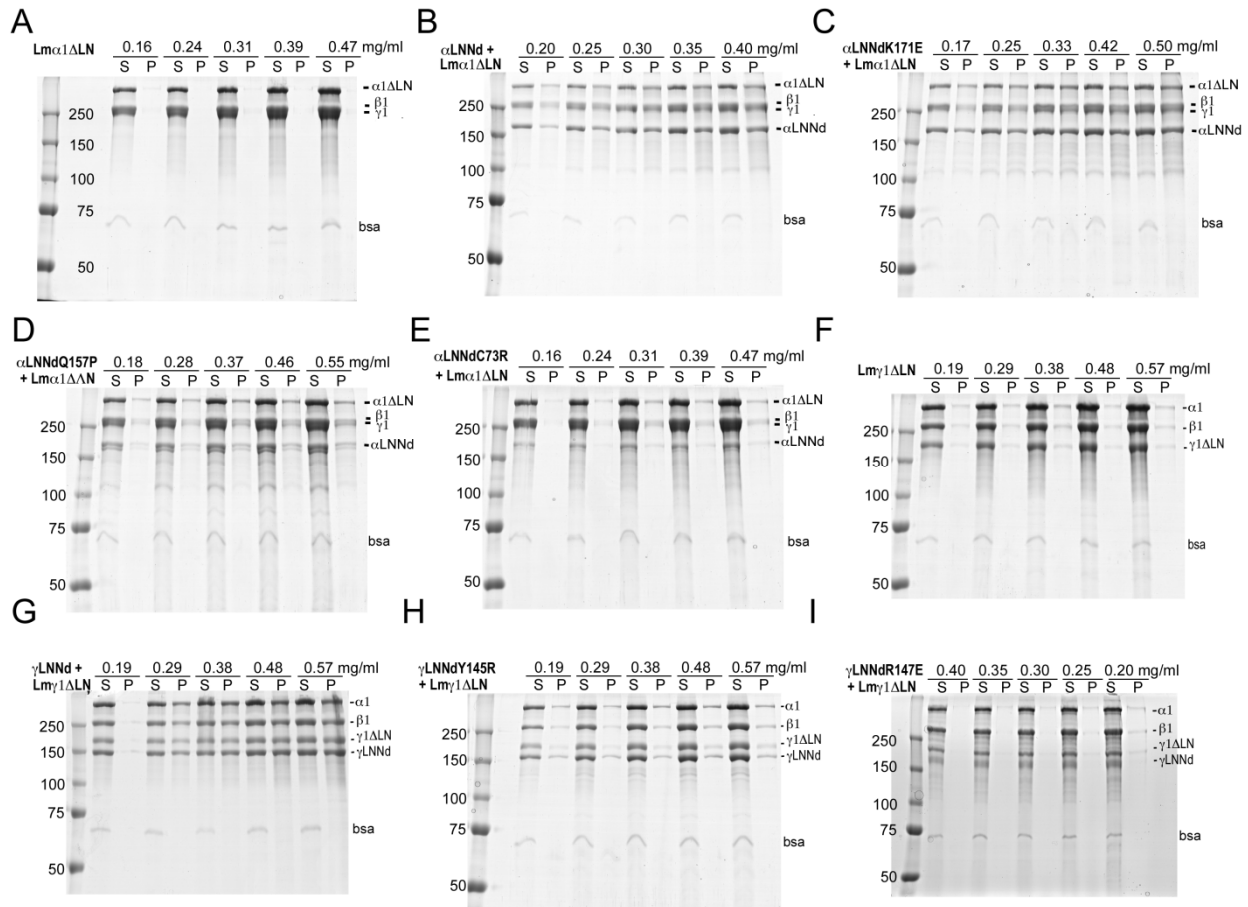

**Supplemental Fig 2. Polymerization of  $\alpha$ LNNd--Lm $\alpha$ 1 $\Delta$ LN and  $\gamma$ LNNd-Lm $\gamma$ 1 $\Delta$ LN complexes.** Panels **A-E**. Lm $\alpha$ 1 $\Delta$ LN, and WT and modified  $\alpha$ LNNd proteins bound to and co-purified with Lm $\alpha$ 1 $\Delta$ LN were incubated at 37°C for 3 h in 50  $\mu$ l aliquots at different concentrations that were then centrifuged to sediment the polymer (P) fraction and separate it from the non-polymerized supernatant (S) fraction. These were then analyzed under reducing conditions by SDS-PAGE and stained with Coomassie blue. WT Lm111,  $\alpha$ LNNd complex, and  $\alpha$ LNNdK171E (containing a poorly conserved residue with a charge change) polymerized whereas complexes with  $\alpha$ LNNd containing conserved residue mutations showed low levels of polymerization. Panels **F-I**. Lm $\gamma$ 1 $\Delta$ LN and WT and modified  $\gamma$ LNNd proteins co-purified with Lm $\gamma$ 1 $\Delta$ LN were treated and analyzed as above. The two mutations substantially reduced polymerization. Plots shown in Fig. 3.

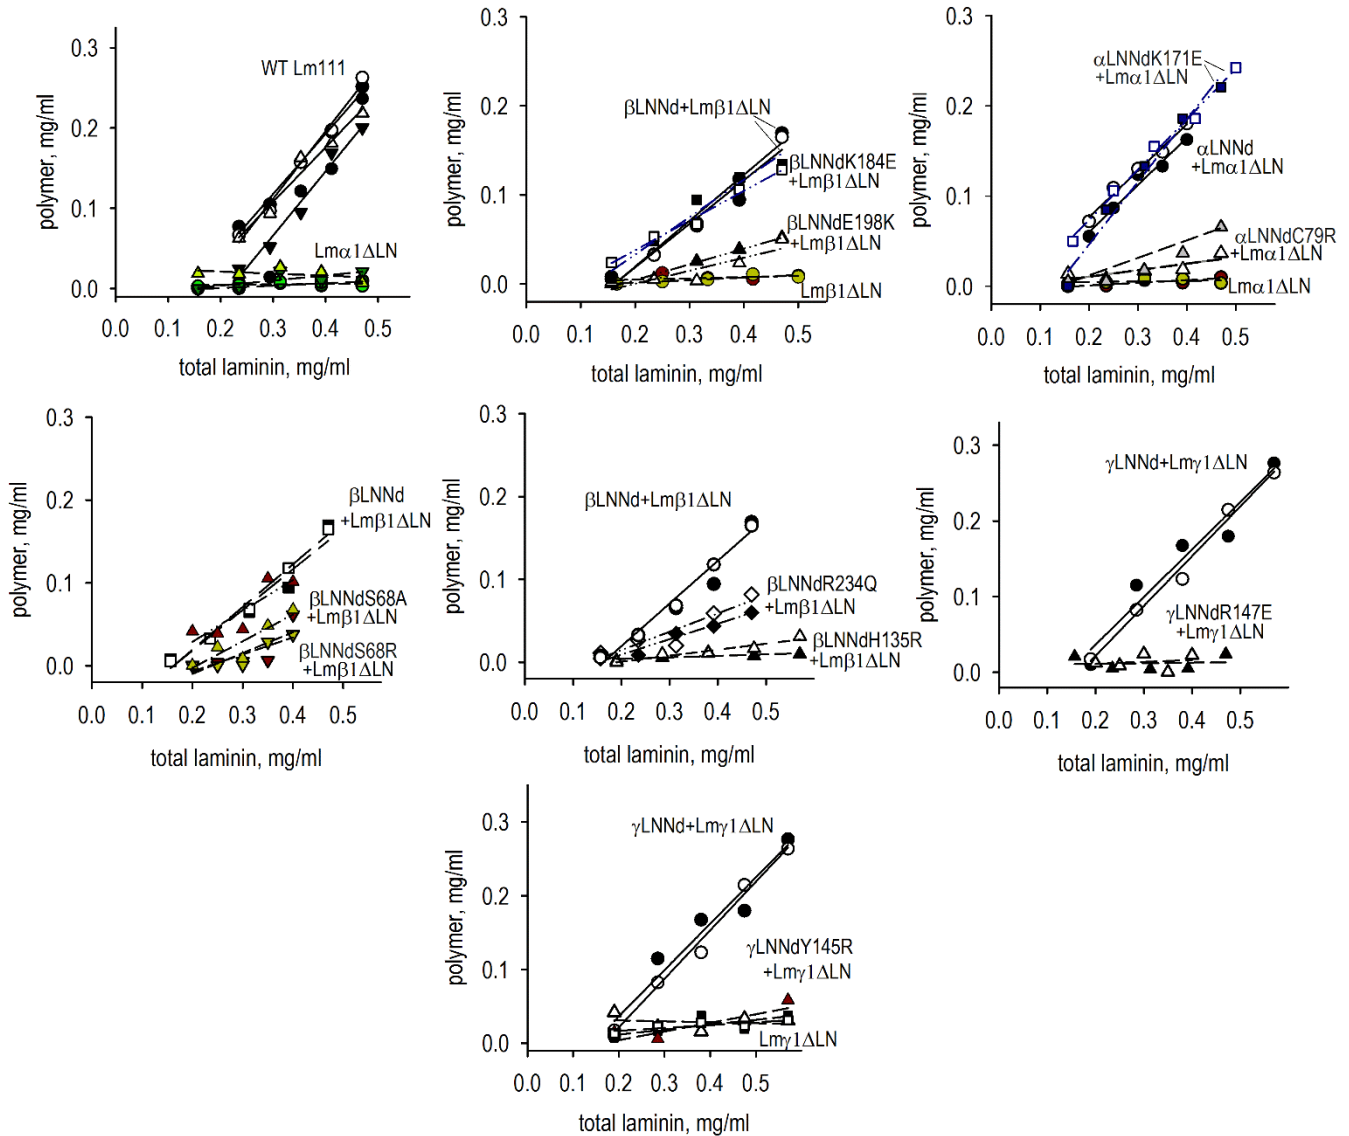

**Supplemental Fig. 3.** Comparisons of polymerization of laminins and laminin/linker protein preparations. Different preparations of laminins and linker protein bound to laminins were incubated at 37°C, centrifuged to separate supernatant (S) from polymer (P), and analyzed by SDS-PAGE as described. Scans of the Coomassie blue stained gels were quantitated by densitometry and plotted as total concentration against polymer concentration. Comparison of pairs (and 4 WT laminin preparations) evaluated reveal limited experimental variability.

**Laminin beta LN domain:**

|                 |                                                                                     |            |
|-----------------|-------------------------------------------------------------------------------------|------------|
| mus Net4        | GANSRCEKACNPRMGNLALGR--KLRADTMCGQNATELFCFYSE-NADLTCRQPKCD-----KCNAH-HSH             | 86         |
| Dro Lmβ1        | PC---ERSSCYPATGNLLIGRENRLTASSTCGLHSPERFCILSHLQ-DKKCF--LCDTREETKHDPYK---             | 109        |
| hum Lmβ2        | GC---SRGSCYPATGDLVGRADRLTASSTCGLNGPQPYCIVSHLQDEKKCF--LCDSR-----RPF-SAR              | 100        |
| mus Lmβ2        | GC---SRGSCYPATGDLVGRADRLTASSTCGLHSPQPYCIVSHLQDEKKCF--LCDSR-----RPF-SAR              | 103        |
| <b>mus Lmβ1</b> | GC---AEGSCYPATGDLVGRADRLTASSTCGLHSPQPYCIVSHLQDEKKCF--ICDSR-----DPY-HET              | <b>88</b>  |
|                 |    |            |
|                 | R                                                                                   |            |
|                 | A                                                                                   |            |
|                 | 68                                                                                  |            |
|                 |                                                                                     |            |
| mus Net4        | LAHPPSAMADSSFRFP-----RTWWQSAEDVHREKIQLDLEAEFYFTHLIMVFKSPRPAAM                       | 142        |
| Dro Lmβ1        | ----NHRIGQIIYKTKPGTNIPTWWQSENGKENATIQLDLEAEFHFTHLIIITFTFRPAAM                       | 166        |
| hum Lmβ2        | DNPNSHRIQNVVTSFAPQ-RRAAWQSENGI PAVTIQLDLEAEFHFTHLIMTFKTFRPAAM                       | 160        |
| mus Lmβ2        | DNPNSHRIQNVVTSFAPQ-RRTAWWQSENGVPMVTIQLDLEAEFHFTHLIMTFKTFRPAAM                       | 163        |
| <b>mus Lmβ1</b> | LNPDSHLIENVVTTFAPN-RLKIWWQSENGVENVTIQLDLEAEFHFTHLIMTFKTFRPAAM                       | <b>148</b> |
|                 | R                                                                                   |            |
|                 | 135                                                                                 |            |
|                 |  |            |
|                 |                                                                                     |            |
| mus Net4        | VLDRSQDFGKTWKPKYKGFATNCSATF-GLEDDVVKK--GAICTSRYSNPFPTGGGEVIFR                       | 199        |
| Dro Lmβ1        | YIERSDFGQTDWHIYRYFAYDCKESFPGVPT-VLENITDVMCTSRYSNVEPSRNGEVIFR                        | 225        |
| hum Lmβ2        | LVERSADFGRTWHVYRYFSDYDCGADFPVPLAPPRHWDVVCESRYSEIEPSTEGEVYIR                         | 220        |
| mus Lmβ2        | LVERSADFGRTWHVYRYFSDYDCGADFPVPLAPPRHWDVVCESRYSEIEPSTEGEVYIR                         | 223        |
| <b>mus Lmβ1</b> | LIERSDFGKAWGVYRYFAYDCESSFPGISTGPMKVVDDIICDSRYSDIEPSTEGEVIFR                         | <b>208</b> |
|                 | E                                                                                   |            |
|                 | 184                                                                                 |            |
|                 |    |            |
|                 | K                                                                                   |            |
|                 | 198                                                                                 |            |
|                 |  |            |
|                 |                                                                                     |            |
| mus Net4        | ALSPPYDIENPYSAKVQEQLKITNLRVRLLLKRQSCPCQINDLNKPHHFMHYAVYDFIVK                        | 258        |
| Dro Lmβ1        | VLPPNINVTDPYAEHVQNQLKMTNLRIQMTKLHKLGDNLLDSRLENEEKYYYGISNMVVR                        | 285        |
| hum Lmβ2        | VLDPAIPIPDYSSRIQNLKLTNLRVNLRLHRTLGDNLLDPRREIREKYYYALYELVVR                          | 280        |
| mus Lmβ2        | VLDPAIPIPDYSSRIQNLKLTNLRVNLRLHRTLGDNLLDPRREIREKYYYALYELVIR                          | 283        |
| <b>mus Lmβ1</b> | ALDPAFKIEDPYSRIQNLKLTNLRKIFVKLHRTLGDNLLDSRMEIREKYYYAVYDMVVR                         | <b>268</b> |
|                 | Q                                                                                   |            |
|                 | 234                                                                                 |            |
|                 |  |            |

**Supplemental Fig.4. Laminin βLN mutations and sequence homologies.** Comparison among mouse (mus), human (hum) and Drosophila (Dro) LN domain sequences including that of the laminin polymer-inhibitor netrin-4. Mutated residues indicated below mouse β1 sequence (mouse sequence number designations used for experimental residue labels). Colored arrows indicate secondary structure near affected residues [36]. Selected human Pierson syndrome –associated and Drosophila heart-associated mutations are indicated in yellow for affected subunit isoform and species. The K184 residue (blue) was chosen for comparison. Patch (red) corresponds in location to the PLENGE polymerization patch described in Lmα5 and located on the β6-β3-β8 “front” face of the LN domain [35, 36].

**Laminin alpha LN domain:**

|                                   |                                                                                                                                                                                                          |                                                                                     |
|-----------------------------------|----------------------------------------------------------------------------------------------------------------------------------------------------------------------------------------------------------|-------------------------------------------------------------------------------------|
| Dro Lm $\alpha$ 5 (A)             | -QAE <del>L</del> TPPYFN <del>L</del> ATGRKIYATATCGQD <del>T</del> DGP-----ELYCKLVGANTE-HDH--IDYSVIQG                                                                                                    | 73                                                                                  |
| mus Lm $\alpha$ 5                 | ----LHPPYFN <del>L</del> AEGARITASATCGEE--AP <del>T</del> RSVSRPT--DLYCKLVGGPVA-GGDPN---QTIQ <del>G</del>                                                                                                | 105                                                                                 |
| hum Lm $\alpha$ 3B                | ----LHPT <del>Y</del> FN <del>L</del> AEAAARIWATATCGER--GPGE <del>G</del> --RPQP-ELYCKLVGGP <del>T</del> A--GS-G---HTIQ <del>G</del>                                                                     | 99                                                                                  |
| hum Lm $\alpha$ 2                 | QQRGLFP <del>A</del> VNLN <del>L</del> ASNALIT <del>T</del> NATCGEK--GP-----EMYCKLV-----EHVPG---QPVRN                                                                                                    | 80                                                                                  |
| mus Lm $\alpha$ 2                 | QQRGLFP <del>A</del> VNLN <del>L</del> ASNALIT <del>T</del> NATCGEK--GP-----EMYCKLV-----EHVPG---QPVRN                                                                                                    | 76                                                                                  |
| <b>mus Lm<math>\alpha</math>1</b> | QQRGLFP <del>A</del> ILN <del>L</del> ATNAHISANATCGEK--GP-----EMFCKLV-----EHVPG---RPVRH                                                                                                                  | <b>70</b>                                                                           |
|                                   |                                                                                                                                                                                                          |                                                                                     |
| Dro Lm $\alpha$ 5 (A)             | QVC <del>D</del> YCD---PTVPERNHPPENAIDGTEAWWQSPPLSRGMKFNEVNLTINFEQEFHVAYL <del>F</del> FIRMGNSPRPGLWTL                                                                                                   | 145                                                                                 |
| mus Lm $\alpha$ 5                 | QY <del>C</del> DI <del>C</del> T---AANSNK <del>A</del> HPVSN <del>A</del> IDGTERWWQSPPLSRGLE <del>Y</del> NEVNNTLDLGGV <del>F</del> HVAYVLIK <del>F</del> FANSRPPDLWVL                                  | 177                                                                                 |
| hum Lm $\alpha$ 3B                | QF <del>C</del> DYCN---SEDPRKAHPVTNAIDGSERWWQSPPLSSGTQY <del>N</del> RVNLTLDLGGV <del>F</del> HVAYILIK <del>F</del> FANSRPPDLWVL                                                                         | 171                                                                                 |
| hum Lm $\alpha$ 2                 | PQ <del>C</del> RICN-QNSSNPYQRHPITNAIDGKNTWWQSPSIKNGIEYHYVTITLDLQ <del>V</del> FQIAYVIVKAANSRPPGNWIL                                                                                                     | 154                                                                                 |
| mus Lm $\alpha$ 2                 | PQ <del>C</del> RICN-QNSSNPYQRHPITNAIDGKNTWWQSPSIKNGVEYHYVTITLDLQ <del>V</del> FQIAYVIVKAANSRPPGNWIL                                                                                                     | 150                                                                                 |
| <b>mus Lm<math>\alpha</math>1</b> | AQC <del>R</del> VCD-GNSTNPRERHPI <del>S</del> H <del>A</del> IDGTNNWWQSPSIQNGREYHWVTITL <del>D</del> LRQV <del>F</del> QVAYII <del>I</del> KAANAPRPGNWIL                                                | <b>144</b>                                                                          |
|                                   | R<br>73                                                                                                                                                                                                  |  |
|                                   |                                                                                                                                                                                                          |                                                                                     |
| Dro Lm $\alpha$ 5 (A)             | EKSTDY <del>G</del> KTWTPWQ <del>H</del> FS <del>D</del> TPAD <del>C</del> ET <del>Y</del> F-----GKDTYKPI <del>T</del> RDD <del>D</del> VICTTEYSKIV                                                      | 196                                                                                 |
| mus Lm $\alpha$ 5                 | ERSTDFGHTYQ <del>P</del> WQ <del>F</del> F <del>A</del> SSKRD <del>C</del> L <del>E</del> R <del>F</del> -----GPRTLERITQDD <del>D</del> VICTTEYSRIV                                                      | 228                                                                                 |
| hum Lm $\alpha$ 3B                | ERSVDFG <del>S</del> TYS <del>P</del> WQ <del>Y</del> F <del>A</del> HSKVD <del>C</del> L <del>K</del> E <del>F</del> G---REANMAV <del>T</del> ---RDD <del>D</del> VLCVTEYSRIV                           | 222                                                                                 |
| hum Lm $\alpha$ 2                 | ERSLDDVE-YK <del>P</del> WQ <del>Y</del> HAVT <del>D</del> TECLTLYNIY <del>P</del> R <del>T</del> GP <del>P</del> SYA---KDDEVICTSFY <del>S</del> KI <del>H</del>                                         | 207                                                                                 |
| mus Lm $\alpha$ 2                 | ERSLDDVE-YK <del>P</del> WQ <del>Y</del> HAVT <del>D</del> TECLTLYNIY <del>P</del> R <del>T</del> GP <del>P</del> SYA---KDDEVICTSFY <del>S</del> KI <del>H</del>                                         | 203                                                                                 |
| <b>mus Lm<math>\alpha</math>1</b> | ERSVDG <del>V</del> K-FK <del>P</del> WQ <del>Y</del> YAVS <del>D</del> TECL <del>T</del> R <del>Y</del> K <del>I</del> T <del>P</del> RRG <del>P</del> P <del>T</del> YR---ADNEVICTSYYSK <del>L</del> V | <b>197</b>                                                                          |
|                                   | P<br>157                                                                                                                                                                                                 | E<br>171                                                                            |
|                                   |                                                                                                                        |    |
|                                   |                                                                                                                                                                                                          |                                                                                     |
| Dro Lm $\alpha$ 5 (A)             | PLENGEIPV <del>L</del> LLNERPSSTNYFNSTVLQEWTRATNVRIRLLR <del>T</del> KNLLGHLMSVARQ-----DPTVTRRY                                                                                                          | 260                                                                                 |
| mus Lm $\alpha$ 5                 | PLENGEIVVSLVNGRPGALNFSYSP <del>L</del> LRDFTKATNIRL <del>R</del> FLRTNTLLGHLMGKALR-----DPTVTRRY                                                                                                          | 292                                                                                 |
| hum Lm $\alpha$ 3B                | PLENGEVV <del>V</del> SLINGRPGAKNFTFSHTLREFTKATNIRL <del>R</del> FLRTNTLLGHLISKAQR-----DPTVTRRY                                                                                                          | 286                                                                                 |
| hum Lm $\alpha$ 2                 | PLENGEIHISLINGRPSADDP--SPELLE <del>F</del> TSARYIRL <del>R</del> RFQRI <del>R</del> TNADLMMFAHKDPREIDPIVTRRY                                                                                             | 274                                                                                 |
| mus Lm $\alpha$ 2                 | PLENGEIHISLINGRPSADDP--SPELLE <del>F</del> TSARYIRL <del>R</del> RFQRI <del>R</del> TNADLMMFAHKDPREIDPIVTRRY                                                                                             | 270                                                                                 |
| <b>mus Lm<math>\alpha</math>1</b> | PLEHGEIHTSLINGRPSADDP--SPQ <del>L</del> LE <del>F</del> TSARYIRL <del>R</del> LRQRI <del>R</del> TNADLMTLSHRDLRDLDPPIVTRRY                                                                               | <b>264</b>                                                                          |
|                                   |                                                                                                                       |                                                                                     |

**Supplemental Fig. 5. Laminin  $\alpha$ LN mutations and sequence homologies.** Comparison among mouse (mus), human (hum) and Drosophila (Dro) LN domain sequences. Mutated residues indicated below mouse  $\alpha$ 1 sequence. Colored arrows and bar indicate secondary structure near affected residues. Human LAMA2-deficient muscular dystrophy-associated mutations indicated in yellow for affected subunit isoform. Lm $\alpha$ 5 residues within PLENGE found to affect LN trimerization indicated in grey [36]. The affected and flanking residues show considerable sequence identity. The non-conserved E171 residue (blue) was chosen for comparison. Patch (red) corresponds in location to the PLENGE polymerization patch described in Lm $\alpha$ 5 and located on the “front” face of the LN domain [36]. Italics for Lm $\alpha$ 5 indicate disordered residues in the  $\alpha$ 5LN-LEa1-2 structural analysis [36].

**Laminin gamma LN domain:**

|          |  |                                                                                   |            |
|----------|--|-----------------------------------------------------------------------------------|------------|
| Dro Lmy1 |  | ECYDPYGRPQKCLPEFINAAYQ                                                            | 77         |
| mus Lmy3 |  | RVLSLLATVASMA-LVIQETHFAAGADMGSCYDGVGRAQRCLPEFENAAFG                               | 54         |
| hum Lmy1 |  | MRGSHRAAPALRPRGRLWPLAVLAAAAAAGC-----AQAAMDECTDEGGRPQRCMPEFVNAAFN                  | 60         |
| mus Lmy1 |  | MTGGGRAALALQPRGRLWPLAVLAAVA--GCVR-----AAMDECADEGGRPQRCMPEFVNAAFN                  | <b>58</b>  |
|          |  |                                                                                   |            |
| Dro Lmy1 |  | LQIESTNTCGEQNDNHFCIQT-MNQNHKNCEFC----KYNDHNPSFLTDLHDPQSPTWWQS                     | 133        |
| mus Lmy3 |  | RRAEASHTCGRPPE-DFCPHVGAAGLQCQRCDADPGRRHDAASYLTDHFSPDDSTWWQS                       | 114        |
| hum Lmy1 |  | VTVVATNTCGTPPE-EYCVQGTGVTGVTKSCHLCDAGQPHLQHGA AFLTDYNNQADTTWWQS                   | 120        |
| mus Lmy1 |  | VTVVATNTCGTPPE-EYCVQGTGVTGVTKSCHLCDAGQQHLQHGA AFLTDYNNQADTTWWQS                   | <b>118</b> |
|          |  |                                                                                   |            |
| Dro Lmy1 |  | ETMFEGIQHPNYVNLTLHLGKSYDITY <b>YV</b> RILFRSPRPESFTIYKRTSESGPWIPYQFYSA            | 193        |
| mus Lmy3 |  | PSMAFGVQYPTSVNLTLSLGKAYEITY <b>YV</b> RLKFHTSRPESFAIYKRTYASGPWEPYQYYS             | 174        |
| hum Lmy1 |  | QTMLAGVQYPSINLTLHLGKAFDITY <b>YV</b> RLKFHTSRPESFAIYKRTREDGPWIPYQYYS              | 180        |
| mus Lmy1 |  | QTMLAGVQYPSINLTLHLGKAFDITY <b>YV</b> RLKFHTSRPESFAIYKRTREDGPWIPYQYYS              | <b>178</b> |
|          |  | R E                                                                               |            |
|          |  | 145 147                                                                           |            |
|          |  |  |            |
|          |  |                                                                                   |            |
| Dro Lmy1 |  | TCRDYSLPDSRAIRKGEGEHAHALCTSEYSDIS <b>PLRDGE</b> IAFSTLEGRPSGINFERSGEL             | 253        |
| mus Lmy3 |  | SCQKTYGRPEGHYLRPGEDERVAFTSEFSDIS <b>PLNGGN</b> VAFSTLEGRPSAYNFEESPVL              | 234        |
| hum Lmy1 |  | SCENTYSKANRGFIRTTGGDEQQALCTDEFSDIS <b>PLTGGN</b> VAFSTLEGRPSAYNFNPNPVL            | 240        |
| mus Lmy1 |  | SCENTYSKANRGFIRTTGGDEQQALCTDEFSDIS <b>PLTGGN</b> VAFSTLEGRPSAYNFNPNPVL            | <b>238</b> |
|          |  |                                                                                   |            |
| Dro Lmy1 |  | QEWVTATDIRITLDRLNTFGDELFGDSQVLKSYFYAI                                             | 290        |
| mus Lmy3 |  | QEWVTSTDILISLDRLNTFGDDIFK DPRVLQSYYYAV                                            | 271        |
| hum Lmy1 |  | QEWVTATDIRVTLNRLNTFGDEVFNPKVLKSYYYAI                                              | 277        |
| mus Lmy1 |  | QEWVTATDIRVTLNRLNTFGDEVFNPKVLKSYYYAI                                              | <b>275</b> |

**Supplemental Fig. 6. Laminin  $\gamma$ LN mutations and sequence homologies.** Comparison among mouse (mus), human (hum) and Drosophila (Dro) LN domain sequences. Mutated residues indicated below mouse  $\gamma$ 1 sequence (mouse sequence number designations used in experimental labels). Patch (red) corresponds in location to the PLENGE polymerization patch described in Lm $\alpha$ 5 and located on the “front” face of the LN domain [35, 36].
